# Supplementary material for: The Prognostic Role of Preoperative Hematological and Inflammatory Indices in Canine Appendicular Osteosarcoma
Source: MDPI journal article supplement (doi:10.3390/vetsci10080495), 2023-08-01
Supplement: s1 [file s1]

**Figure S1:** Distribution of absolute count in the whole population. Abbreviation: PFS = Progression Free Survival

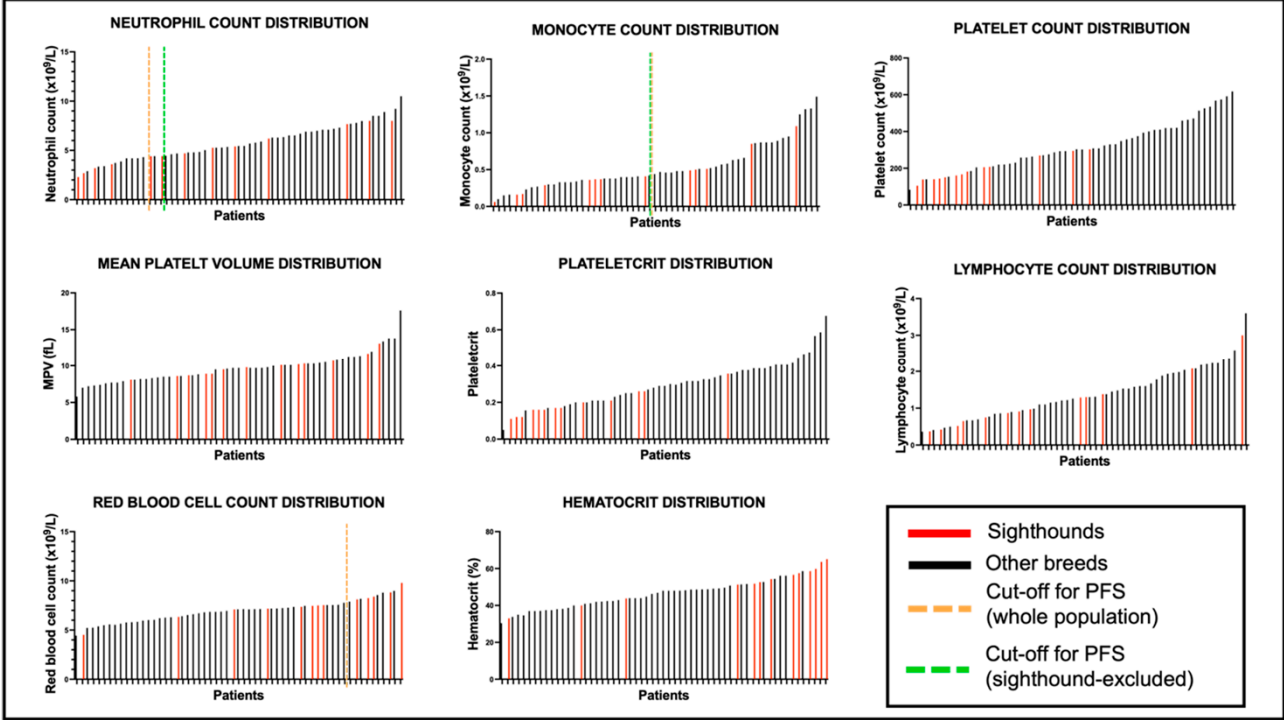

**Figure S2:** Distribution of hematological ratios in the whole population. Abbreviations: LMR: lymphocyte/monocyte ratio, NLR: neutrophil/lymphocyte ratio, NMR: neutrophil/monocyte ratio, PLR: platelet/lymphocyte ratio, PMR: platelet/monocyte ratio, PNR: platelet/neutrophil ratio, SII (systemic inflammatory index) : [(PLT  $\times$  N)/L]

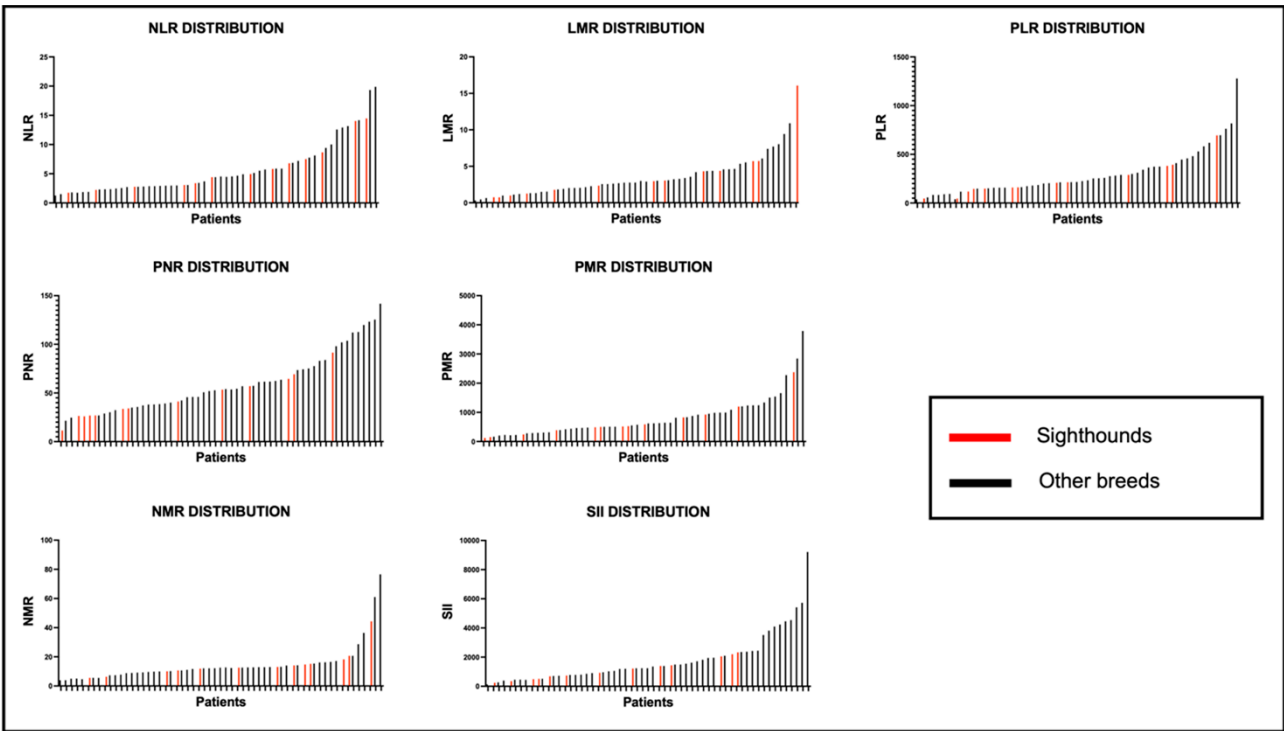

**Figure S3:** Variation of hazard ratio per cut-off assessed for the neutrophil count (A), monocyte count (B), red blood cell count (C), hematocrit (D) and NMR (E) analyzed for overall survival time of the whole population. Solid lines represent the hazard ratio (HR) and the dotted line represents the 95% confidence interval around each HR (95% CI).

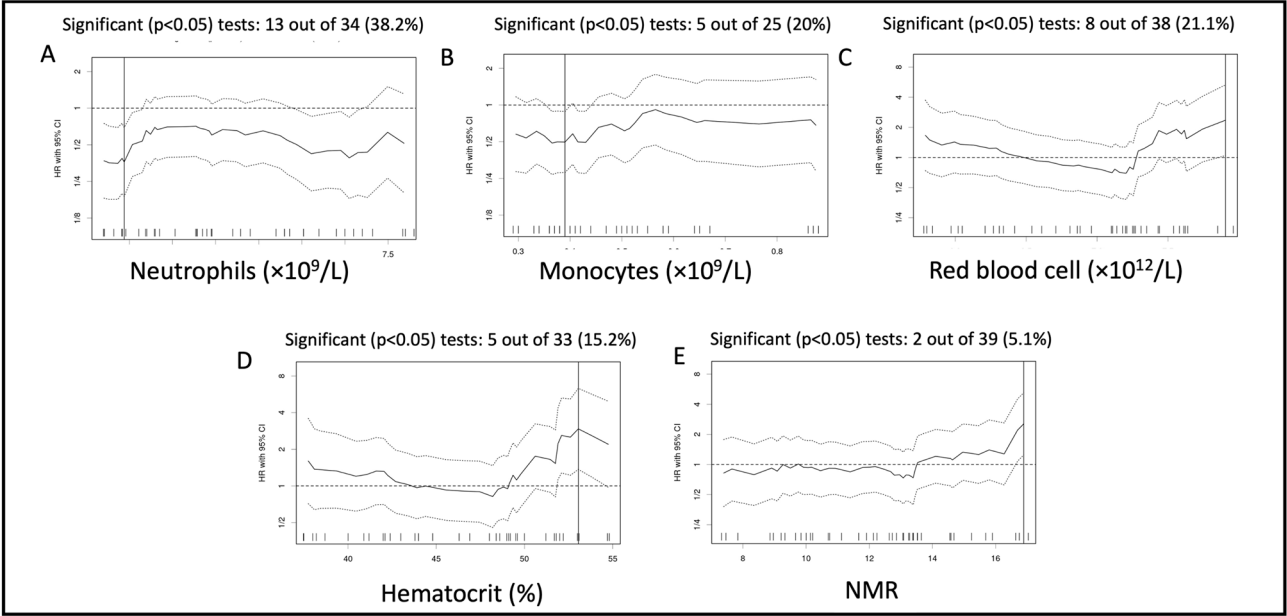

**Figure S4:** Variation of hazard ratio per cut-off assessed for the neutrophil count (A), monocyte count (B) and PNR (C) analyzed for overall survival time of the sighthound-excluded population. Solid lines represent the hazard ratios (HR) and the dotted line represents the 95% confidence interval around each HR (95% CI).

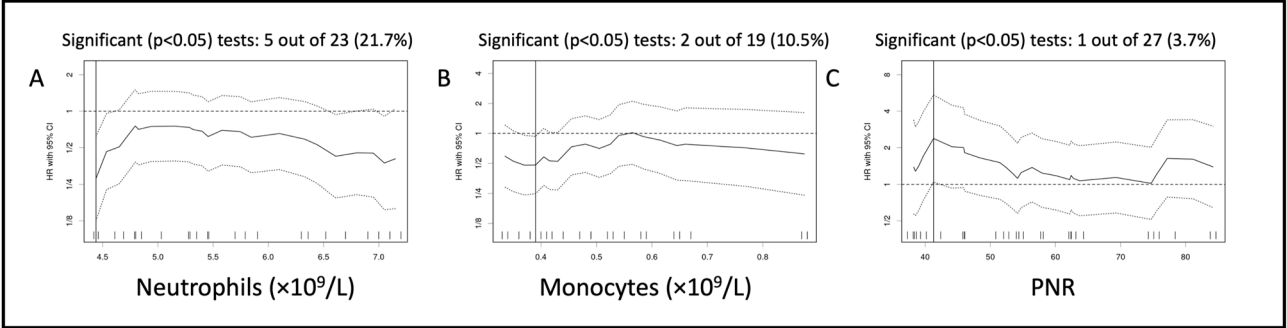

**Table S1:** Detailed data for the whole population

| ID | Breed                | Sex | Age (years) | BW (kg) | Clinical signs duration (day) | Tumour location     | Haematology to amputation (days) | Initial thoracic staging | ALP (IU/L) | Number of carboplatin doses | Carboplatin dose (mg/m <sup>2</sup> ) | Adverse events (VCOG grading) leading to altered dosing      | Outcome                    | PFS (days) | OST (days) |
|----|----------------------|-----|-------------|---------|-------------------------------|---------------------|----------------------------------|--------------------------|------------|-----------------------------|---------------------------------------|--------------------------------------------------------------|----------------------------|------------|------------|
| 1  | Cross Breed          | FN  | 13.5        | 21.4    | 5                             | Scapula             | 9                                | XR                       | 108        | 3                           | 300                                   | N/A                                                          | Deceased – suspected OSA   | 54*        | 252        |
| 2  | American Bulldog     | FN  | 8.5         | 54      | 88                            | Tibia               | 7                                | CT                       | 513        | 6                           | 300                                   | N/A                                                          | Deceased – OSA             | 183*       | 207        |
| 3  | Rottweiler           | F   | 7           | 45      | 0                             | Humerus (diaphysis) | 21                               | CT                       | 126        | 5                           | 300                                   | N/A                                                          | Deceased – suspected OSA   | 261        | 261        |
| 4  | Greyhound            | FN  | 8.5         | 24      | 20                            | Proximal humerus    | 14                               | CT                       | 140        | 3                           | 300                                   | N/A                                                          | Deceased – OSA             | 109*       | 135        |
| 5  | German Shepherd      | FN  | 7           | 31.7    | 29                            | Radius              | 8                                | XR                       | 39         | 6                           | 300                                   | N/A                                                          | Deceased – OSA             | 184*       | 184        |
| 6  | Labrador             | MN  | 3           | 46      | 38                            | Radius              | 19                               | CT                       | NA         | 6                           | 270-300                               | gII lethargy – dose reduction                                | Deceased – suspected OSA   | 160*       | 160        |
| 7  | Miniature Schnauzer  | FN  | 11          | 8       | 46                            | Tibia               | 1                                | XR                       | 260        | 6                           | 10mg/kg                               | N/A                                                          | Deceased – OSA             | 647*       | 685        |
| 8  | Greyhound            | MN  | 11          | 30      | NA                            | Femur               | 14                               | XR                       | 109        | 6                           | 300                                   | N/A                                                          | Deceased – OSA             | 599*       | 599        |
| 9  | Rottweiler           | FN  | 12          | 34.6    | 15                            | Proximal humerus    | 6                                | CT                       | 216        | 6                           | 285-300                               | gII lethargy, gII GI V/D – dose reduction                    | Deceased – OSA             | 142*       | 219        |
| 10 | German Shepherd Dog  | FN  | 6           | 40      | 15                            | Femur               | 2                                | CT                       | 46         | 4                           | 270-300                               | gIV neutropenia, gII D – dose reduction and altered schedule | LTFO                       | ≥283       | ≥283       |
| 11 | Miniature Schnauzer  | FN  | 10          | 6.4     | 25                            | Radius              | 8                                | XR                       | 57         | 6                           | 300                                   | N/A                                                          | Deceased – unrelated cause | 1476       | 1476       |
| 12 | Doberman             | MN  | 8.5         | 44.2    | 7                             | Tibia               | 7                                | CT                       | 87         | 6                           | 300                                   | N/A                                                          | Deceased – cause unknown   | 570*       | 738        |
| 13 | Rottweiler           | FN  | 9.5         | 36      | 14                            | Proximal humerus    | 4                                | CT                       | 127        | 3                           | 300                                   | N/A                                                          | Deceased – suspected OSA   | 301        | 301        |
| 14 | Irish Setter         | ME  | 6           | 37      | 20                            | Radius              | 8                                | CT                       | 37         | 3                           | 300                                   | N/A                                                          | Deceased – OSA             | 85*        | 85         |
| 15 | Belgian Shepherd Dog | FN  | 9           | 39.6    | 57                            | Radius              | 11                               | CT                       | 112        | 6                           | 270-285                               | gII lethargy and gIII D – dose reduction                     | Deceased – suspected OSA   | 143        | 143        |
| 16 | Greyhound            | MN  | 6           | 32      | 47                            | Femur               | 13                               | CT                       | NA         | 3                           | 275-300                               | gI neutropenia – dose reduction                              | Deceased – OSA             | 87*        | 199        |
| 17 | Lurcher              | FN  | 7           | 27.2    | 42                            | Left tibia          | 0                                | CT                       | 52         | 4                           | 270-300                               | gII neutropenia - dose reduction and altered schedule        | Deceased – suspected OSA   | 139*       | 180        |
| 18 | Cross Breed          | MN  | 5           | 24      | 16                            | Right radius        | 4                                | CT                       | 40         | 6                           | 300                                   | N/A                                                          | LTFO                       | ≥581       | ≥581       |
| 19 | Labrador             | FN  | 10          | 34.4    | 32                            | Proximal humerus    | 7                                | CT                       | 149        | 2                           | 300                                   | N/A                                                          | Deceased – suspected OSA   | 75         | 75         |

|    |                           |    |      |       |     |                  |    |    |        |   |                                       |                                  |                            |       |       |
|----|---------------------------|----|------|-------|-----|------------------|----|----|--------|---|---------------------------------------|----------------------------------|----------------------------|-------|-------|
| 20 | Lurcher                   | FN | 9.5  | 21    | 45  | Left femur       | 3  | CT | 260    | 5 | 300                                   | N/A                              | LFTO                       | 181*  | ≥181  |
| 21 | Deerhound                 | FN | 7    | 45    | 75  | Tibia            | 5  | XR | 402    | 3 | 300                                   | N/A                              | Deceased – OSA             | 78*   | 78    |
| 22 | Deerhound                 | FN | 5    | 30.5  | 127 | Radius           | 3  | CT | 62     | 3 | 300                                   | N/A                              | Deceased – OSA             | 110*  | 113   |
| 23 | Cross Breed               | MN | 6.5  | 38.4  | 31  | Tibia            | 14 | CT | 50     | 3 | 300                                   | N/A                              | LTFO                       | 89*   | ≥196  |
| 24 | American Bulldog          | FN | 6    | 45.6  | 89  | Tibia            | 10 | CT | 98     | 2 | 300                                   | N/A                              | Deceased – unrelated cause | 121   | 121   |
| 25 | Rottweiler                | ME | 8    | 52    | 4   | Tibia            | 1  | CT | 87     | 2 | 300                                   | N/A                              | LTFO                       | 121*  | ≥331  |
| 26 | Greyhound                 | MN | 11.5 | 30    | 1   | Proximal humerus | 20 | CT | 43     | 4 | 300                                   | N/A                              | LTFO                       | 88*   | ≥88   |
| 27 | Rottweiler                | ME | 10   | 50    | 20  | Proximal humerus | 0  | CT | 675.4  | 3 | 300                                   | N/A                              | Deceased – OSA             | 56*   | 65    |
| 28 | Cross Breed               | FN | 9    | 23    | 6   | Tibia            | 5  | CT | 57.5   | 4 | 300                                   | N/A                              | Deceased – OSA             | 64*   | 115   |
| 29 | Cross Breed               | FN | 12.5 | 23.4  | 27  | Proximal humerus | 1  | CT | 207.64 | 4 | 300                                   | N/A                              | Deceased – OSA             | 159*  | 201   |
| 30 | Pitt bull                 | FN | 12.5 | 31    | 1   | Femur            | 0  | CT | 312.4  | 5 | 300                                   | N/A                              | Deceased – OSA             | 277*  | 278   |
| 31 | German Shepherd Dog       | ME | 7    | 36.2  | 8   | Radius           | 14 | CT | 29     | 5 | 300                                   | N/A                              | Deceased – OSA             | 351*  | 370   |
| 32 | Cross Breed               | FN | 9.5  | 22    | 6   | Proximal humerus | 0  | CT | 231    | 4 | 300                                   | N/A                              | Deceased – OSA             | 137*  | 218   |
| 33 | German Shepherd Dog       | F  | 1.5  | 34    | 10  | Proximal humerus | 11 | CT | 34     | 6 | 250 (first)<br>300 (after escalation) | N/A                              | Deceased – unrelated cause | 113*  | 182   |
| 34 | German Shepherd Dog       | FN | 6    | 26.3  | 19  | Femur            | 0  | CT | 11     | 6 | 250 (first)<br>300 (after escalation) | N/A                              | Deceased – suspected OSA   | 124   | 124   |
| 35 | Rottweiler                | FN | 10   | 39    | 3   | Proximal humerus | 0  | CT | 140    | 5 | 250 (first)<br>300 (after escalation) | N/A                              | Deceased – OSA             | 120*  | 151   |
| 36 | Greyhound                 | F  | 10   | 26    | 4   | Proximal humerus | 15 | CT | 70     | 1 | 250                                   | N/A                              | Deceased – OSA             | 34*   | 36    |
| 37 | German Shepherd Dog       | ME | 8    | 33    | 2   | Femur            | 0  | CT | 28     | 6 | 300                                   | N/A                              | LTFO                       | 168*  | ≥174  |
| 38 | Rottweiler                | F  | 9    | 40    | 15  | Radius           | 0  | CT | 571    | 6 | 250 (first)<br>300 (after escalation) | N/A                              | Deceased – unrelated cause | 860*  | 873   |
| 39 | Cane Corso                | ME | 8.5  | 50    | 13  | Tibia            | 0  | CT | 124    | 4 | 300                                   | N/A                              | LTFO                       | ≥1493 | ≥1493 |
| 40 | Greyhound                 | FN | 7    | 28.15 | 59  | Distal femur     | 1  | CT | 65     | 5 | 250                                   | N/A                              | Deceased – OSA             | 280*  | 281   |
| 41 | Pyrenean Mountain Dog     | FN | 9.5  | 51.5  | 143 | Distal femur     | 6  | CT | 52     | 3 | 250 (first)<br>279 (after escalation) | N/A                              | Deceased – OSA             | 94*   | 94    |
| 42 | German Wirehaired Pointer | MN | 7    | 39    | 19  | Distal tibia     | 11 | CT | 56     | 2 | 270-300                               | gII lethargy – dose reduction    | Deceased – OSA             | 78*   | 181   |
| 43 | Greyhound                 | MN | 8.5  | 36.9  | 44  | Distal tibia     | 2  | CT | 89     | 4 | 270-300                               | unknown cause for dose reduction | Deceased – OSA             | 182*  | 304   |

|    |                               |    |      |      |    |                  |    |    |     |   |         |                                                     |                          |      |      |
|----|-------------------------------|----|------|------|----|------------------|----|----|-----|---|---------|-----------------------------------------------------|--------------------------|------|------|
| 44 | Labrador Retriever            | ME | 9    | 31.2 | 2  | Distal femur     | 5  | CT | 58  | 4 | 270-300 | gII neutropenia, gI otitis externa – dose reduction | Deceased – suspected OSA | 181  | 181  |
| 45 | Labrador                      | ME | 11   | 25   | 1  | Femur            | 15 | XR | 68  | 4 | 300     | N/A                                                 | Deceased – OSA           | 502* | 502  |
| 46 | Rhodesian Ridgeback           | ME | 10   | 44.6 | 30 | Ulna             | 6  | CT | 120 | 4 | 300     | N/A                                                 | Deceased – suspected OSA | 213  | 213  |
| 47 | Crossbreed dog                | F  | 8    | 21.7 | 14 | Distal tibia     | 4  | CT | 66  | 4 | 300     | N/A                                                 | Deceased – OSA           | 544* | 544  |
| 48 | Greyhound                     | F  | 13   | 22.3 | 14 | Distal tibia     | 19 | XR | 163 | 4 | 300     | N/A                                                 | Deceased – OSA           | 128* | 158  |
| 49 | Crossbreed dog                | ME | 7    | 37.7 | 28 | Distal radius    | 1  | CT | 115 | 3 | 300     | N/A                                                 | Deceased – OSA           | 86*  | 95   |
| 50 | Rottweiler                    | F  | 6    | 34.6 | 21 | Proximal humerus | 1  | CT | 154 | 4 | 300     | N/A                                                 | LTFO                     | 366* | ≥689 |
| 51 | German Shepherd Dog           | ME | 9    | 42.3 | 3  | Distal femur     | 0  | XR | 83  | 4 | 300     | N/A                                                 | LTFO                     | ≥222 | ≥222 |
| 52 | Rottweiler                    | ME | 10   | 46.2 | 28 | Proximal humerus | 0  | XR | 147 | 4 | 300     | N/A                                                 | Deceased – OSA           | 100* | 100  |
| 53 | American Bulldog              | ME | 11   | 33   | 28 | Distal radius    | 1  | CT | 45  | 4 | 300     | N/A                                                 | LTFO                     | 287* | ≥287 |
| 54 | Siberian Husky                | F  | 11   | 20.3 | 28 | Diaphysis ulna   | 19 | CT | 40  | 4 | 300     | N/A                                                 | Deceased – OSA           | 760* | 760  |
| 55 | Cavalier King Charles spaniel | MN | 10   | 6.2  | 19 | Distal femur     | 2  | CT | NA  | 4 | 10mg/kg | N/A                                                 | Deceased – suspected OSA | 106  | 106  |
| 56 | Crossbreed                    | FN | 8    | 21.3 | 33 | Distal femur     | 11 | XR | NA  | 4 | 300     | N/A                                                 | Deceased – suspected OSA | 140  | 140  |
| 57 | Labrador                      | ME | 4    | 29.7 | 16 | Distal radius    | 0  | CT | 159 | 4 | 300     | N/A                                                 | Deceased – suspected OSA | 133  | 133  |
| 58 | Greyhound                     | FN | 8.8  | 24.9 | 5  | Distal tibia     | 0  | XR | 59  | 4 | 300     | N/A                                                 | Deceased – suspected OSA | 104  | 104  |
| 59 | Labrador                      | MN | 11.5 | 36.3 | 7  | Distal femur     | 13 | CT | 157 | 4 | 300     | N/A                                                 | Deceased – OSA           | 119* | 119  |

Abbreviations: BW: Body weight (kg), CT: computerised tomography, E: entire, F: female, LTFO: lost to follow-up, M: male, N: neutered, OSA: osteosarcoma, OST: overall survival time PFS: Progression Free Survival, XR: radiographs.

Legend: \* indicates dogs for which progression was documented with imaging; when progression/death was not documented by the time of last contact, the sign “≥” highlights censored dogs for which the date of progression/death is unknown.

**Table S2:** Univariable and multivariable analysis – Association of OST with variables in the whole population

|                                             | Univariable analysis |                     |              | Multivariable analysis |                   |
|---------------------------------------------|----------------------|---------------------|--------------|------------------------|-------------------|
|                                             | cut-off              | HR (95% CI)         | p-value      | HR (95% CI)            | p-value           |
| <b>N</b>                                    | 4.44                 | 0.36<br>0.19-0.69   | <b>0.001</b> | 0.27<br>(0.13-0.53)    | <b>&lt; 0.001</b> |
| <b>M</b>                                    | 0.39                 | 0.5<br>0.28-0.88    | <b>0.015</b> | -                      | -                 |
| <b>PLT</b>                                  | 209.5                | 0.67<br>0.34-1.31   | 0.23         | -                      | -                 |
| <b>MPV</b>                                  | 11.25                | 0.66<br>0.29-1.48   | 0.31         | -                      | -                 |
| <b>PCT</b>                                  | 0.41                 | 0.53<br>0.23-1.21   | 0.13         | -                      | -                 |
| <b>L</b>                                    | 1.97                 | 1.52<br>0.78-2.97   | 0.21         | -                      | -                 |
| <b>RBC</b>                                  | 7.91                 | 2.35<br>1.04-5.31   | <b>0.033</b> | -                      | -                 |
| <b>HCT</b>                                  | 53.05                | 2.94<br>1.37-6.32   | <b>0.004</b> | 3.38<br>(1.5-7.67)     | <b>0.003</b>      |
| <b>NLR</b>                                  | 2.85                 | 0.57<br>0.31-1.08   | <b>0.08</b>  | -                      | -                 |
| <b>LMR</b>                                  | 5.1                  | 1.7<br>0.84-3.45    | 0.14         | -                      | -                 |
| <b>PLR</b>                                  | 150.3                | 0.64<br>0.32-1.27   | 0.19         | -                      | -                 |
| <b>PNR</b>                                  | 41.83                | 1.8<br>0.94-3.39    | 0.07         | -                      | -                 |
| <b>PMR</b>                                  | 1065                 | 1.7<br>0.9-3.21     | 0.1          | -                      | -                 |
| <b>NMR</b>                                  | 16.89                | 2.55<br>1.25-5.2    | <b>0.008</b> | 2.24<br>(1.06-4.74)    | <b>0.03</b>       |
| <b>SII</b>                                  | 1232                 | 0.71<br>0.4-1.25    | 0.23         | -                      | -                 |
| <b>Sex</b><br>(Male vs Female)              |                      | 0.74<br>0.41-1.34   | 0.32         | -                      | -                 |
| <b>AGE</b>                                  | 7.5                  | 0.73<br>0.39-1.36   | 0.32         | -                      | -                 |
| <b>BW</b>                                   | 39.8                 | 0.7<br>0.35-1.39    | 0.3          | -                      | -                 |
| <b>Staging modality</b><br>(CT vs XR)       | -                    | 0.96<br>0.49-1.89   | 0.91         | -                      | -                 |
| <b>ALP</b>                                  | 133.5                | 1.52<br>0.81-2.83   | 0.19         | -                      | -                 |
| <b>OSA location</b><br>(Prox. hum vs other) | -                    | 1.8<br>0.9-3.56     | 0.096        | 2.11<br>(1.03-4.32)    | <b>0.04</b>       |
| <b>Amputation to chemotherapy</b>           | 19.5                 | 0.77<br>(0.44-1.37) | 0.38         | -                      | -                 |

Abbreviations: 95% CI: 95% confidence interval, ALP: alkaline phosphatase, BW: body weight, CT: computed tomography, HCT: hematocrit, HR: hazard ratio, L: lymphocyte count, LMR: lymphocyte/monocyte ratio, M: monocyte count, MPV: mean platelet volume, N: neutrophil count, NLR: neutrophil/lymphocyte ratio, NMR: neutrophil/monocyte ratio, PCT: plateletcrit, PLR: platelet/lymphocyte ratio, PLT: platelet count, PMR: platelet/monocyte ratio, PNR: platelet/neutrophil ratio, Prox. Hum.: proximal humerus, RBC: red blood cell count, SII (systemic inflammatory index) : [(PLT × N)/L], XR: radiographs. Significant p-values in bold.

**Table S3:** Univariable and multivariable analysis – Association of overall survival time with variables in the population after the exclusion of sighthounds.

|                                             | Univariable analysis |                     |                  | Multivariable analysis |              |
|---------------------------------------------|----------------------|---------------------|------------------|------------------------|--------------|
|                                             | cut-off              | HR (95% CI)         | p-value          | HR (95% CI)            | p-value      |
| <b>N</b>                                    | 4.44                 | 0.28<br>(0.13-0.62) | <b>&lt;0.001</b> | 0.32<br>(0.11-0.57)    | <b>0.006</b> |
| <b>M</b>                                    | 0.39                 | 0.48<br>(0.25-0.93) | <b>0.03</b>      | -                      | -            |
| <b>PLT</b>                                  | 305                  | 1.76<br>(0.88-3.5)  | 0.11             | -                      | -            |
| <b>MPV</b>                                  | 8.45                 | 0.77<br>(0.38-1.56) | 0.47             | -                      | -            |
| <b>PCT</b>                                  | 0.285                | 1.68<br>(0.82-3.42) | 0.15             | -                      | -            |
| <b>L</b>                                    | 1.97                 | 1.71<br>(0.83-3.56) | 0.14             | -                      | -            |
| <b>RBC</b>                                  | 7.21                 | 0.48<br>(0.22-1.04) | 0.057            | -                      | -            |
| <b>HCT</b>                                  | 48.2                 | 0.56<br>(0.27-1.15) | 0.11             | -                      | -            |
| <b>NLR</b>                                  | 2.85                 | 0.54<br>(0.26-1.08) | 0.08             | -                      | -            |
| <b>LMR</b>                                  | 1.87                 | 1.71<br>(0.75-3.91) | 0.2              | -                      | -            |
| <b>PLR</b>                                  | 250.5                | 1.65<br>(0.86-3.17) | 0.13             | -                      | -            |
| <b>PNR</b>                                  | 41.28                | 2.39<br>(1.04-5.45) | <b>0.03</b>      | 2.06<br>(0.89-4.77)    | 0.09         |
| <b>PMR</b>                                  | 850.2                | 1.69<br>(0.88-3.24) | 0.11             | -                      | -            |
| <b>NMR</b>                                  | 13.39                | 0.56<br>(0.26-1.23) | 0.14             | -                      | -            |
| <b>SII</b>                                  | 1636                 | 0.76<br>(0.39-1.49) | 0.42             | -                      | -            |
| <b>Sex</b><br>(Male vs Female)              |                      | 0.88<br>(0.45-1.72) | 0.71             | -                      | -            |
| <b>AGE</b>                                  | 9.25                 | 1.36<br>(0.71-2.6)  | 0.35             | -                      | -            |
| <b>BW</b>                                   | 39.8                 | 0.7<br>(0.33-1.46)  | 0.33             | -                      | -            |
| <b>Staging modality</b><br>(CT vs XR)       | -                    | 0.63<br>(0.36-1.87) | 0.36             | -                      | -            |
| <b>ALKP</b>                                 | 125                  | 1.58<br>(0.8-3.16)  | 0.19             | -                      | -            |
| <b>OSA location</b><br>(Prox. hum vs other) | -                    | 1.75<br>(0.82-3.81) | 0.15             | -                      | -            |
| <b>Amputation to chemotherapy</b>           | 14.5                 | 0.63<br>(0.29-1.35) | 0.23             | -                      | -            |

Abbreviations: 95% CI: 95% confidence interval, ALP: alkaline phosphatase, BW: body weight, CT: computed tomography, HCT: hematocrit, HR: hazard ratio, lymphocyte count, LMR: lymphocyte/monocyte ratio, M: monocyte count, MPV: mean platelet volume, N: neutrophil count, NLR: neutrophil/lymphocyte ratio, NMR: neutrophil/monocyte ratio, PCT: plateletcrit, PLR: platelet/lymphocyte ratio, PLT: platelet count, PMR: platelet/monocyte ratio, PNR: platelet/neutrophil ratio, Prox. Hum.: proximal humerus, RBC: red blood cell count, SII (systemic inflammatory index) :  $[(\text{PLT} \times \text{N})/\text{L}]$ , XR: radiographs. Significant p-values in bold.
